# Supplementary material for: Perceiving the temperature coefficients of carbon-based perovskite solar cells
Source: Royal Society of Chemistry journal article supplement (doi:10.1039/d0se00782j), 2020-01-01
Supplement: d0se00782j1.pdf [file d0se00782j1.pdf]

## Perceiving the temperature coefficients of carbon-based perovskite solar cells

Shubhranshu Bhandari,<sup>\*a</sup> Anurag Roy,<sup>a</sup> Aritra Ghosh,<sup>a</sup> Tapas Kumar Mallick<sup>a</sup> and Senthilarasu Sundaram<sup>\*a</sup>

<sup>a</sup>Environment and Sustainability Institute (ESI), Penryn Campus, University of Exeter, Cornwall, TR10 9FE, U.K.

\* Corresponding authors

E-mail: [sb964@exeter.ac.uk](mailto:sb964@exeter.ac.uk), [s.sundaram@exeter.ac.uk](mailto:s.sundaram@exeter.ac.uk)

**Supplementary note 1:** Performance evaluation of the as-prepared  $S_T$  c-PSC devices made in ambient conditions in the temperature range of 5 °C to 75 °C. Fig. S1 suggests 25 °C is the most suitable for the working ability of devices in  $S_T$  conditions. The average integrated photocurrent densities of  $S_T$  c-PSCs are given in Table S1 along with the EIS spectra fitting data.

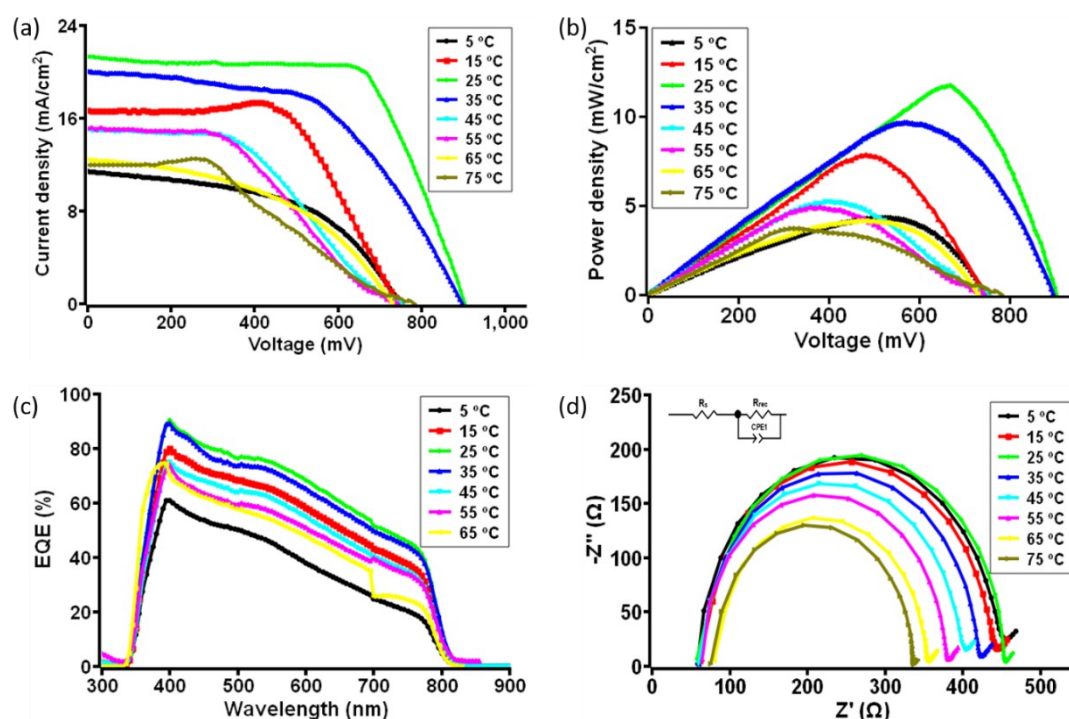

**Fig. S1** (a) Current density – voltage ( $J$ - $V$ ) curves and (b) power density - voltage curve for the  $S_T$  PSCs at different temperatures in the range of 5 °C to 75 °C, (c) IPCE spectra of c-PSCs at different temperatures, and (d) corresponding EIS characteristics (Nyquist plots) with the fitted circuit diagram for  $S_T$  devices having the best performance.

**Table S1** Integrated photocurrent density values of  $S_T$  devices at different temperatures calculated from IPCE, and EIS spectra fitting data of respective devices.

| <b>Temperature (°C)</b> | <b>Integrated <math>J_{SC}</math> (mA.cm<sup>-2</sup>)</b> | <b><math>R_S</math> (<math>\Omega</math>)</b> | <b><math>R_{rec}</math> (<math>\Omega</math>)</b> |
|-------------------------|------------------------------------------------------------|-----------------------------------------------|---------------------------------------------------|
| 5                       | 9.75                                                       | 58.19                                         | 380.6                                             |
| 15                      | 14.6                                                       | 59.47                                         | 374.1                                             |
| 25                      | 20                                                         | 54.36                                         | 343                                               |
| 35                      | 16.43                                                      | 60.13                                         | 357.3                                             |
| 45                      | 13.69                                                      | 59.07                                         | 335.3                                             |
| 55                      | 13.0                                                       | 61.34                                         | 315.7                                             |
| 65                      | 11.85                                                      | 78.88                                         | 273                                               |
| 75                      | 11.02                                                      | 75.54                                         | 207.5                                             |

**Supplementary note 2:** Photovoltaic performance variation at different temperature is given in Fig. S2 for  $S_T$  condition. The variation was observed for five devices at a particular temperature.

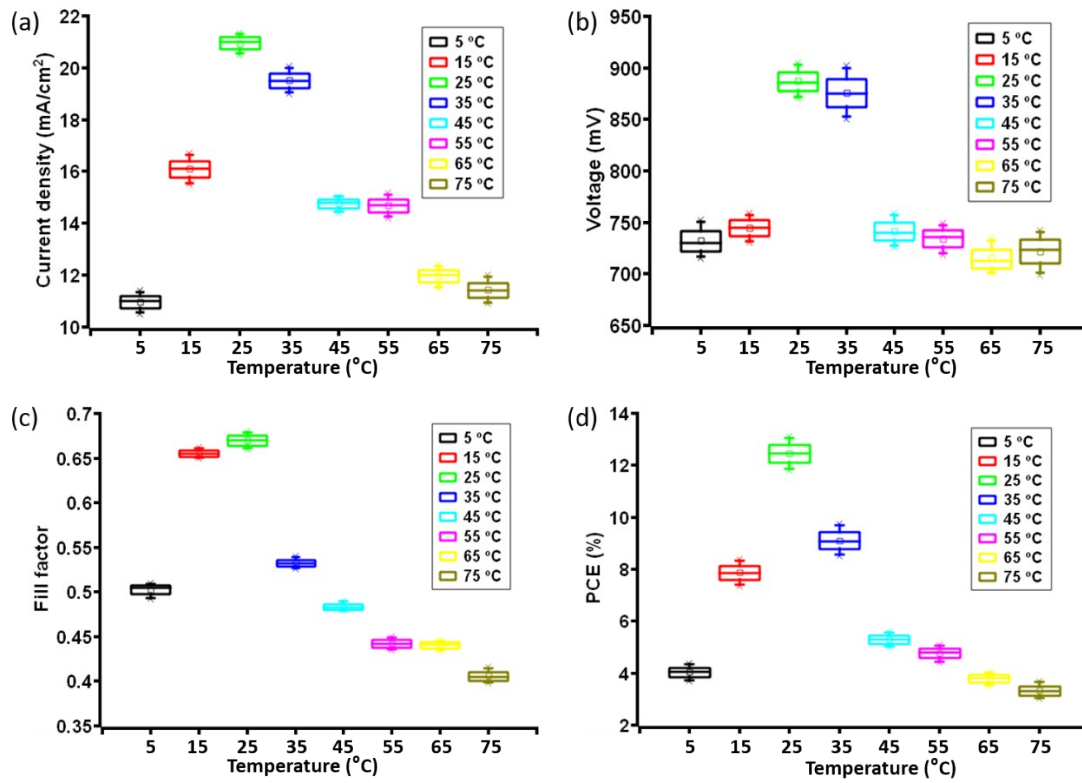

**Fig. S2** Photovoltaic characterization of three randomly picked  $S_T$  devices for each temperature in the range of 5 °C to 75 °C. Box and whiskers plot of current density vs. temperature (a), voltage vs. temperature (b), Fill factor vs. temperature (c), and PCE vs. temperature (d), respectively.

**Supplementary note 3:** Performance evaluation of the as-prepared  $T_T$  c-PSC devices made in ambient conditions in the temperature range of 5 °C to 75 °C. The Fig. S3 suggests 15 to 35 is the most suitable for the effectiveness of devices. The average integrated photocurrent densities of  $T_T$  c-PSCs are given in Table S2 along with the EIS spectra fitting data.

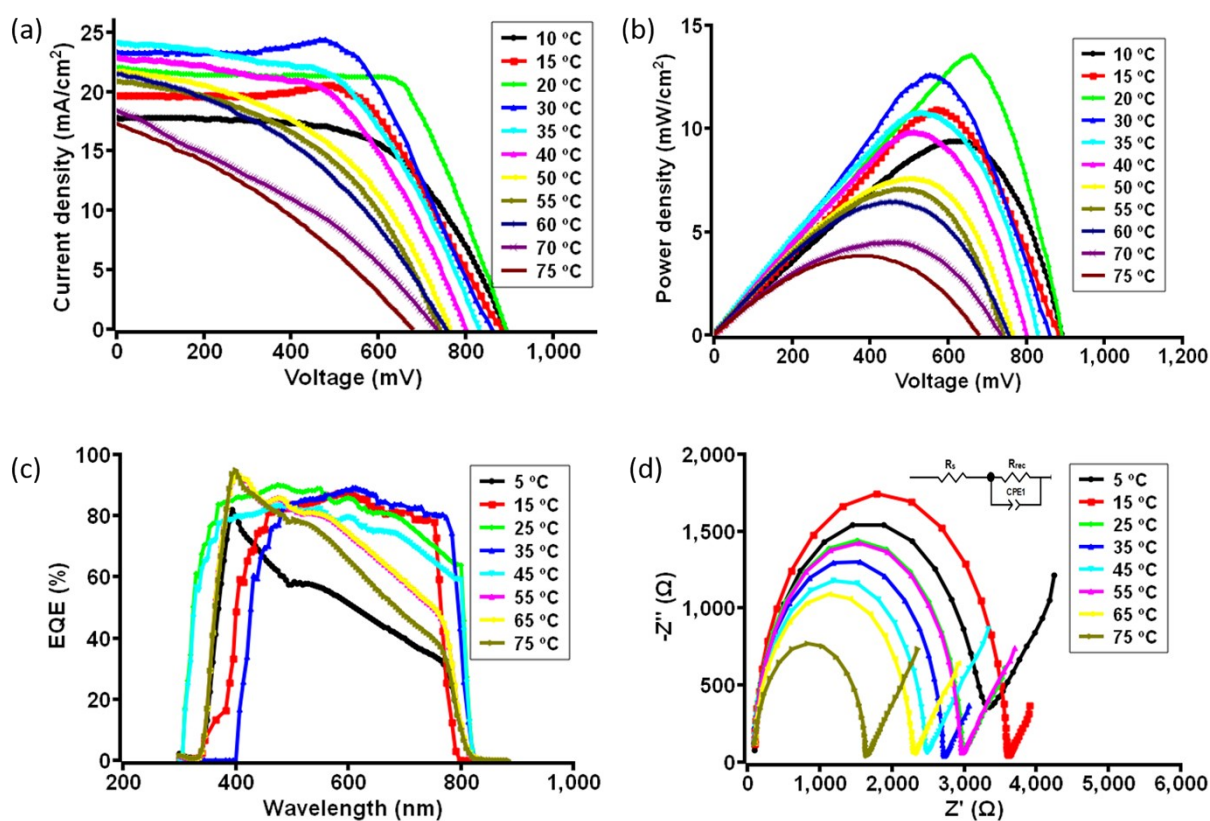

**Fig. S3** (a) Current density - voltage curves and (b) power density - voltage curve for the  $T_T$  PSCs at different temperatures in the range of 5 °C to 75 °C, (c) IPCE spectra of c-PSCs at different temperatures, and (d) corresponding EIS characteristics (Nyquist plots) with the fitted circuit diagram for  $T_T$  devices having the best performance.

**Table S2** Integrated photocurrent density values of  $T_T$  devices at different temperatures calculated from IPCE, and EIS spectra fitting data of respective devices.

| <b>Temperature (°C)</b> | <b>Integrated <math>J_{SC}</math> (mA.cm<sup>-2</sup>)</b> | <b><math>R_s</math> (<math>\Omega</math>)</b> | <b><math>R_{rec}</math> (<math>\Omega</math>)</b> |
|-------------------------|------------------------------------------------------------|-----------------------------------------------|---------------------------------------------------|
| 5                       | 13.1                                                       | 96.9                                          | 3015                                              |
| 15                      | 18.5                                                       | 77.55                                         | 2936                                              |
| 25                      | 21                                                         | 66.37                                         | 1599                                              |
| 35                      | 22.4                                                       | 89.18                                         | 2619                                              |
| 45                      | 20.7                                                       | 89.2                                          | 2359                                              |
| 55                      | 18.4                                                       | 94.32                                         | 2844                                              |
| 65                      | 17.1                                                       | 94.72                                         | 2171                                              |
| 75                      | 16.5                                                       | 93.62                                         | 1536                                              |

**Supplementary note 4:** Photovoltaic performance variation at different temperature is given in Fig. S4 for  $T_T$  condition. The variation was observed for five devices over the entire range of temperature.

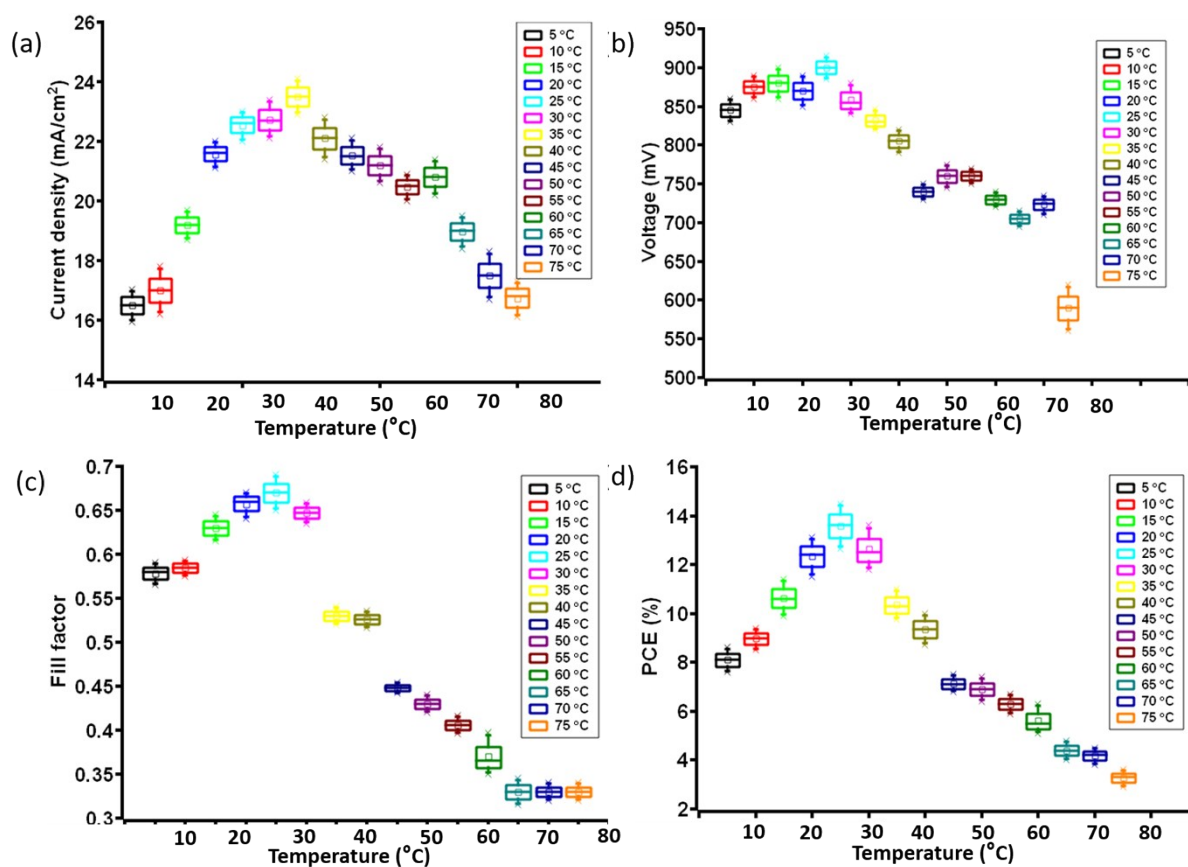

**Fig. S4** Photovoltaic characterization of three randomly picked  $T_T$  devices for each temperature in the range of 5 °C to 75 °C. Box and whiskers plot of current density vs. temperature (a), voltage vs. temperature (b), Fill factor vs. temperature (c), and PCE vs. temperature (d), respectively.

**Supplementary note 5:** The full cycle of temperature treatment for the champion device in temperature range of 5 to 75 °C is shown in Fig. S5. It shows a reversible nature of  $T_T$  testing devices.

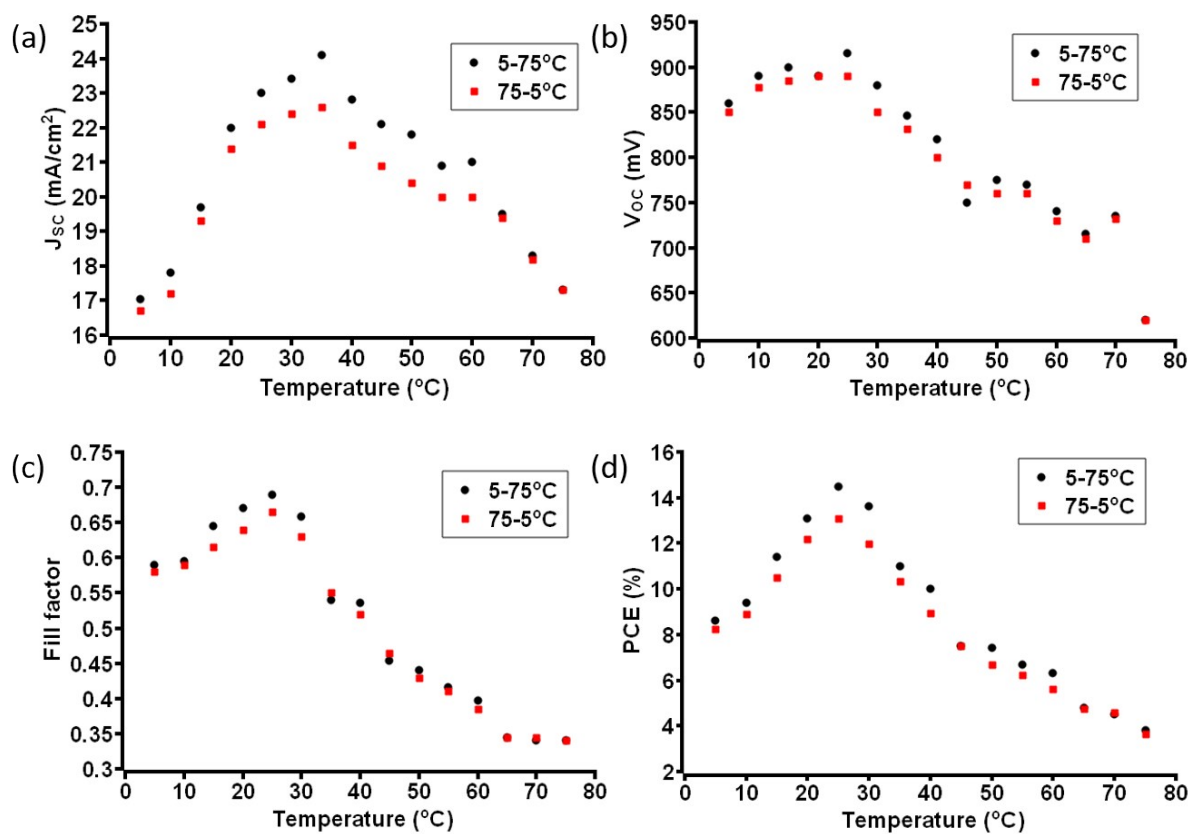

**Fig. S5** The reversible nature of the parameters of champion device in  $T_T$  testing conditions.

**Supplementary note 6:** XRD plot shown in Fig. S5 dictates the formation  $\text{PbI}_2$  at low and high temperature zones. The extent of degradation is more at high temperature region. The degradation of perovskite does not form any kind of composites with  $\text{Al}_2\text{O}_3$ . Although higher rate of degradation at around  $75^\circ\text{C}$  suggest favourable interaction between  $\text{Al}_2\text{O}_3$  and  $\text{PbI}_2$ .

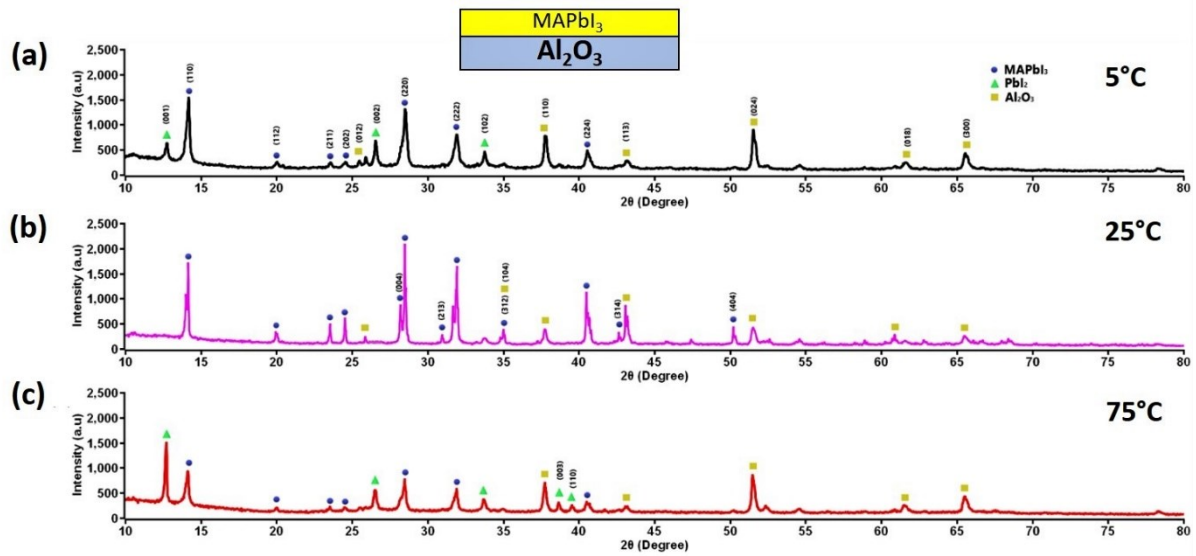

**Fig. S6** XRD data of  $\text{Al}_2\text{O}_3$  and perovskite at  $5^\circ\text{C}$ ,  $25^\circ\text{C}$ , and  $75^\circ\text{C}$ , respectively.



**Supplementary note 7:** The XRD plot given in Fig. S6 shows the presence of anatase and rutile phase of  $\text{TiO}_2$  for all three temperature conditions. The extent of perovskite degradation in low and high temperature is almost similar. No trace of composite formation was found.

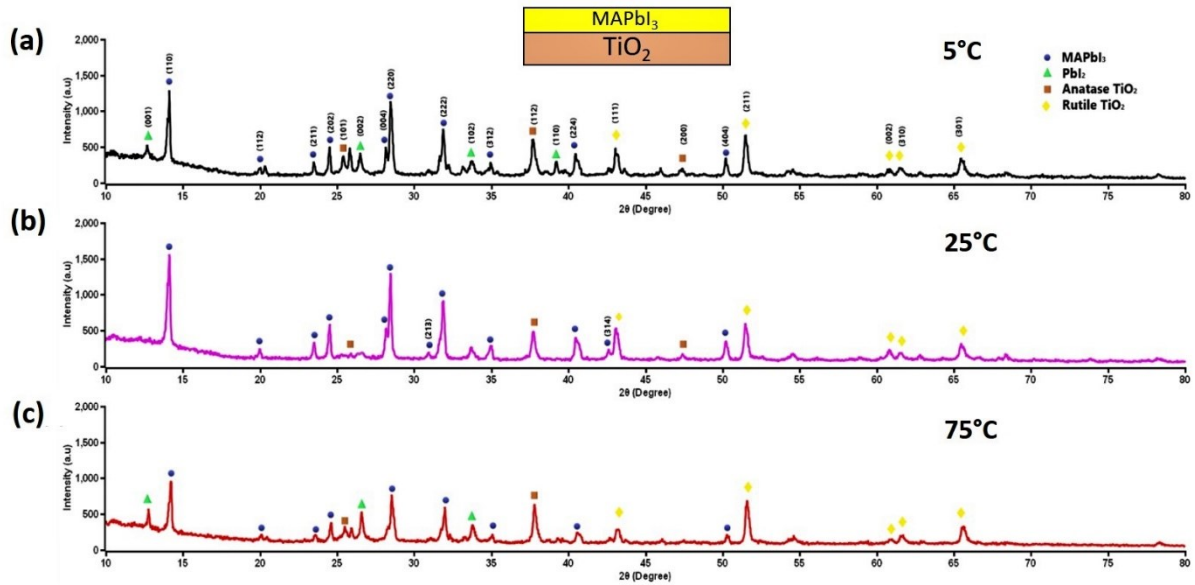

**Fig. S7** XRD data of with  $\text{TiO}_2$  and perovskite at 5, 25, and 75 °C, respectively.

**Supplementary note 8:** Fig. S6 demonstrates top surface FESEM images showing the formation of composite material with carbon depending on temperature. At 25 °C (Fig. S6c), fine particle structure of the carbon electrode with perovskite can be seen. On the other hand, Fig. S6b and S6d claim the formation of composite in moving towards lower and higher temperatures from 25 °C.

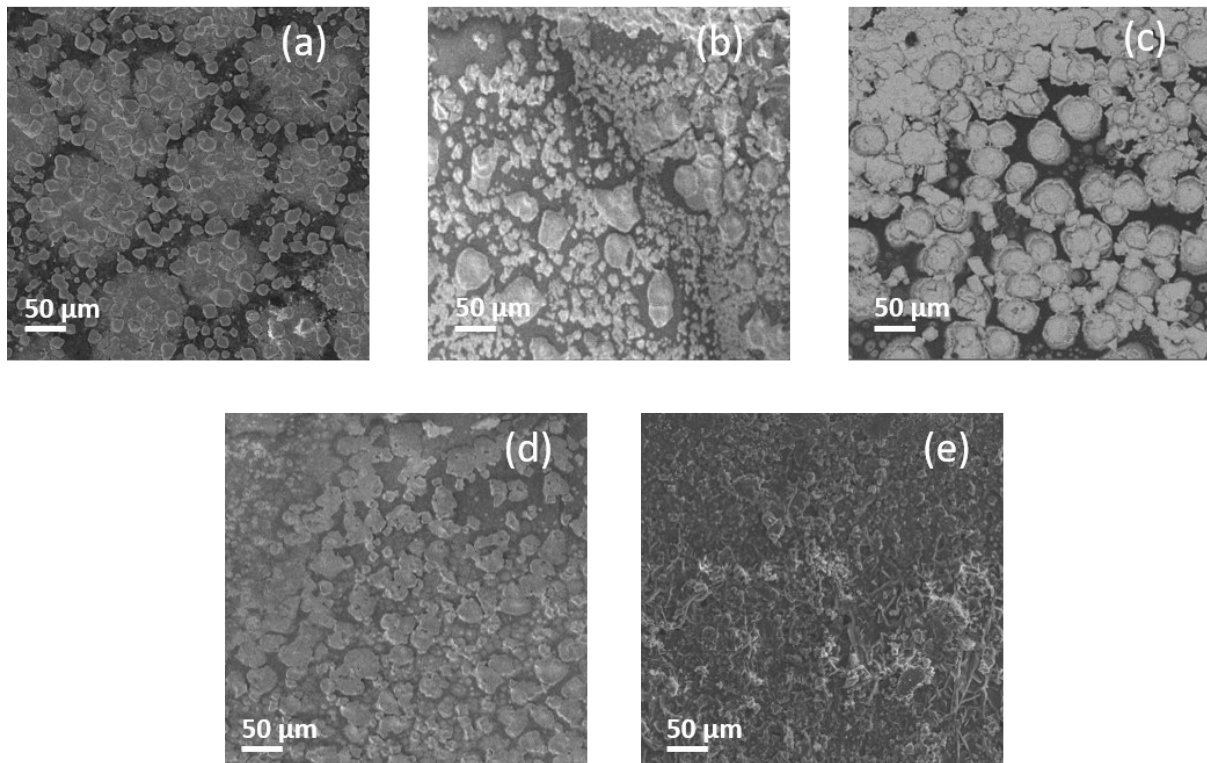

**Fig. S8** (a) Top surface SEM of S<sub>T</sub> devices at 5 °C, (b) top surface FESEM of S<sub>T</sub> devices at 15 °C, (c) top surface SEM of S<sub>T</sub> devices at 25 °C, (d) top surface FESEM of S<sub>T</sub> devices at 45 °C, and (e) top surface SEM of S<sub>T</sub> of devices at 75 °C.
